# Supplementary material for: Green synthesis of corn stalk-derived carbon dots for enhanced wound healing
Source: Royal Society of Chemistry journal article supplement (doi:10.1039/d5tb01929j), 2026-01-01
Supplement: d5tb01929j1.pdf [file d5tb01929j1.pdf]

**Supporting Information**

**Green Synthesis of Corn Stalk-Derived Carbon Dots for  
Enhanced Wound Healing**

Yuan Zhang <sup>a</sup>, Ruinan Wang <sup>b</sup>, Hengping Wang <sup>a</sup>, Haiming Cheng <sup>a</sup> Huiyan Wang <sup>a,\*</sup>

<sup>a</sup> Jilin Collaborative Innovation Center for Antibody Engineering, Jilin Medical University, Jilin 132013, China

<sup>b</sup> College of Laboratory, Jilin Medical University, Jilin, China

\* Corresponding authors at: Jilin Collaborative Innovation Center for Antibody Engineering, Jilin Medical University, Jilin, China

\* Corresponding authors.

E-mail addresses: zynbplus@163.com (Huiyan Wang)

Keywords: carbon dots, ROS scavenging, wound repair.

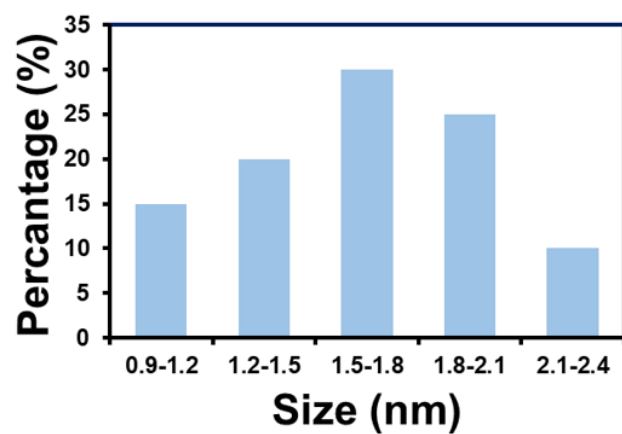

Figure S1. Average size distribution of CDs.

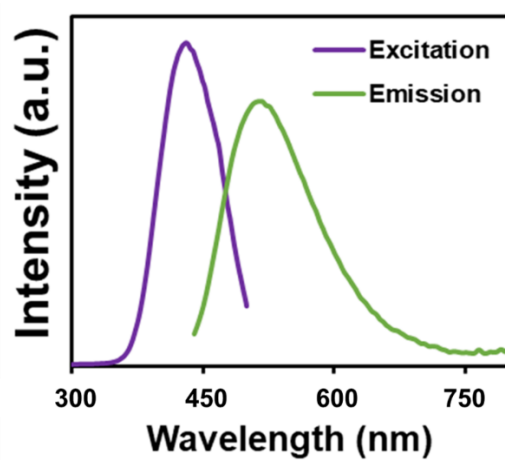

Figure S2. Excitation and emission spectra of CDs.

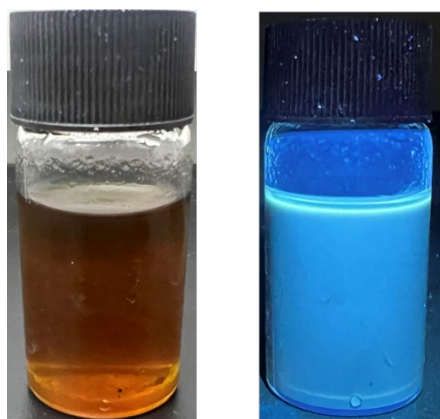

**Figure S3.** Images and fluorescence images of CDs.

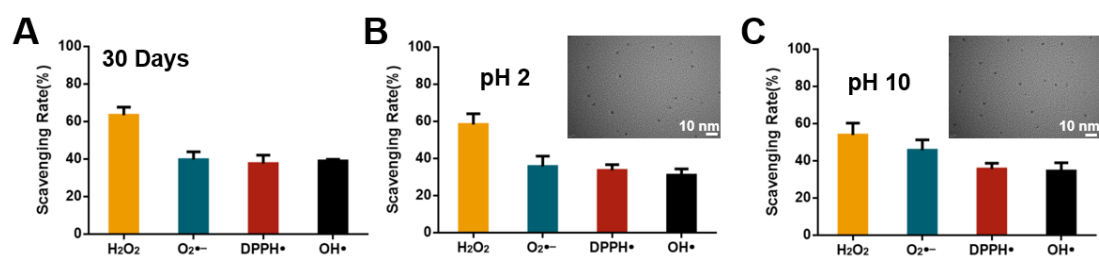

**Figure S4.** (A) ROS scavenging ability after 30 days at room temperature. (B) and (C) ROS scavenging activity and TEM images after treatment under different pH conditions. (n = 4)

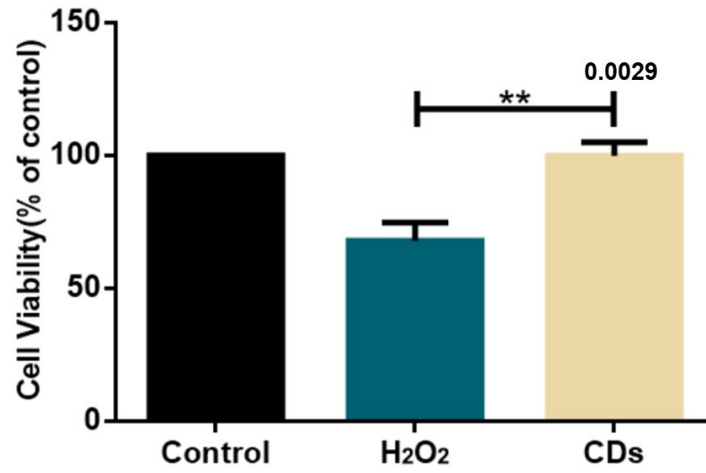

**Figure S5.** Proliferative activity of H<sub>2</sub>O<sub>2</sub>-injured NIH/3T3 after treatment with PBS and CDs (40 mg ml<sup>-1</sup>). \*\*p < 0.01.

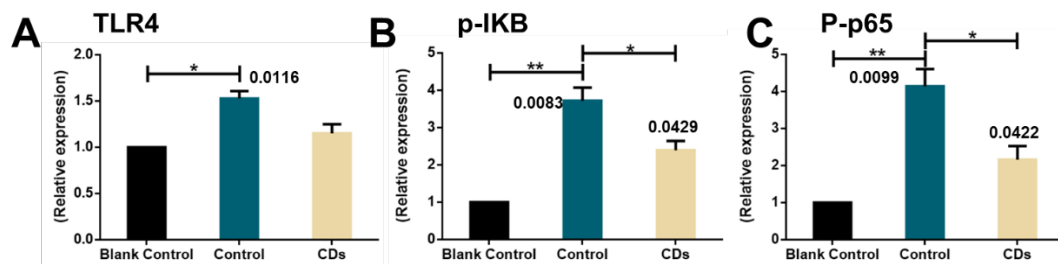

**Figure S6.** Quantitative analysis of TLR4, p-IKB, and p-P65 protein expression (n = 3, \*p < 0.05, \*\*p < 0.01, \*\*\*p < 0.001).

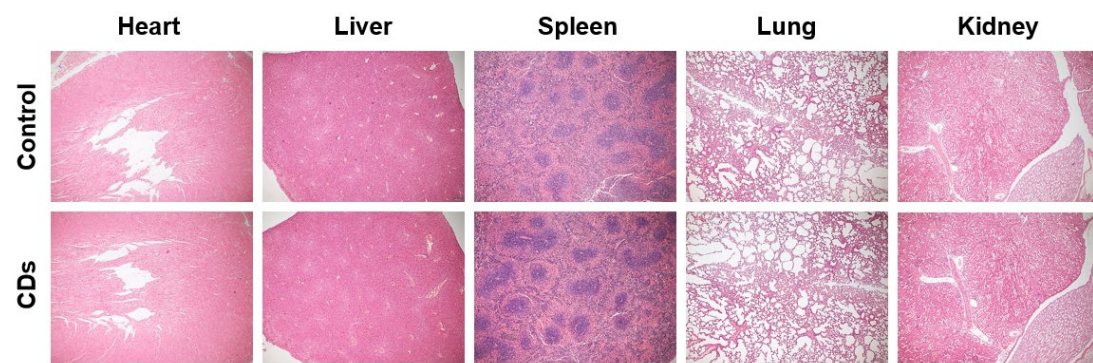

**Figure S7.** H&E slice images of heart, liver, spleen, lung and kidney after recovery from CDs treatment (n = 3).

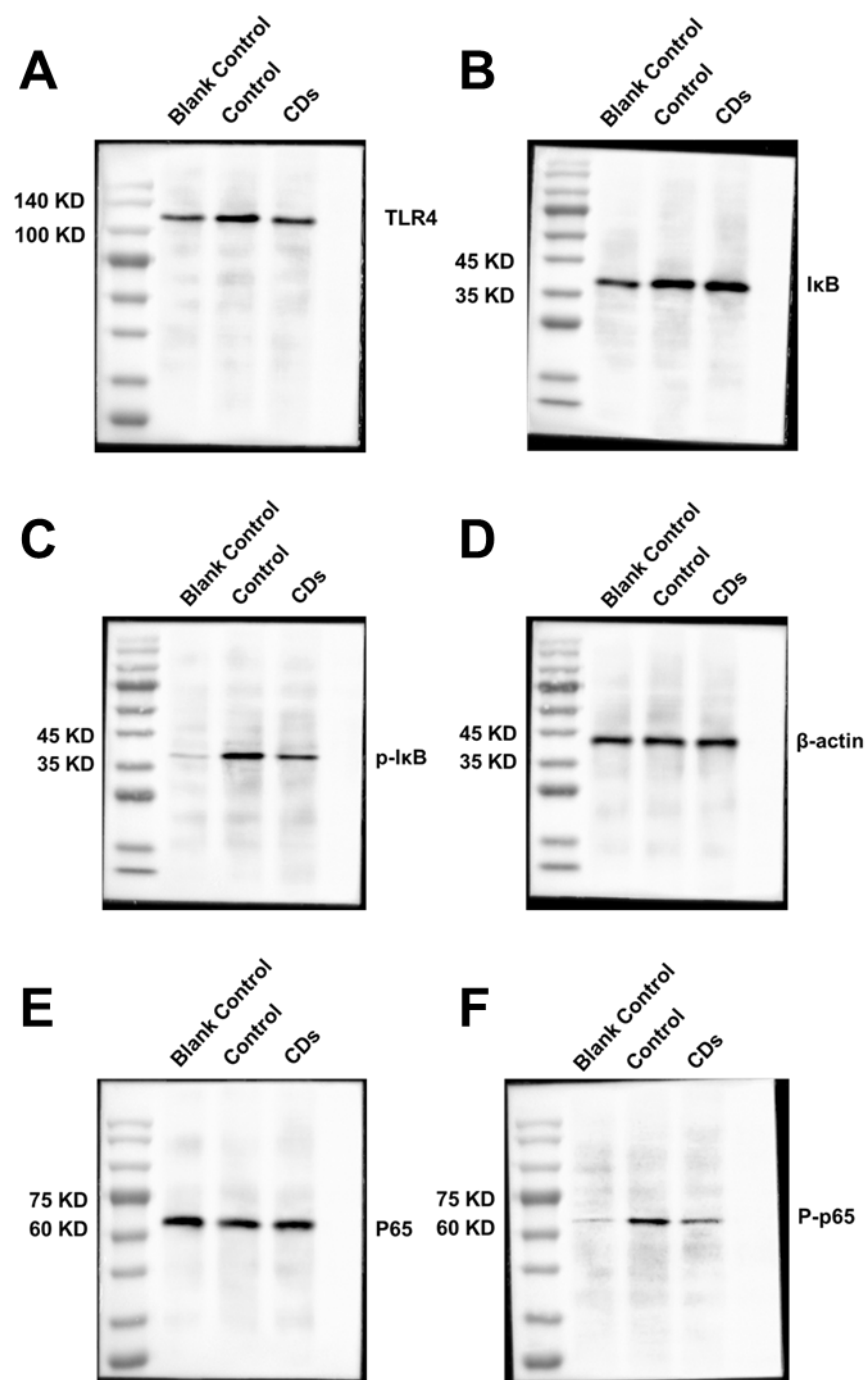

**Figure S8.** Raw western bot data for Figure 5D.
